# Supplementary material
Source: HighWire-hosted journal article supplement (http://thorax.bmjjournals.com/highwire/filestream/174124/field_highwire_adjunct_files/1/Sup_fig1.pdf)

Figure E1

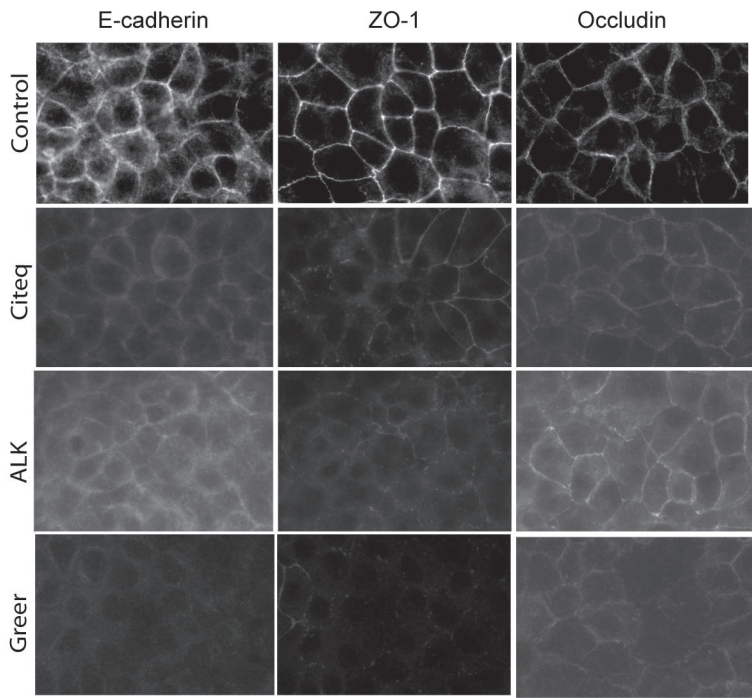

Supplement: Sup_fig1.pdf [file Sup_fig1.pdf]
